# Supplementary material for: Characterization of the Cassava Mycobiome in Symptomatic Leaf Tissues Displaying Cassava Superelongation Disease
Source: MDPI journal article supplement (doi:10.3390/jof9121130), 2023-11-23
Supplement: s1 [file s1]

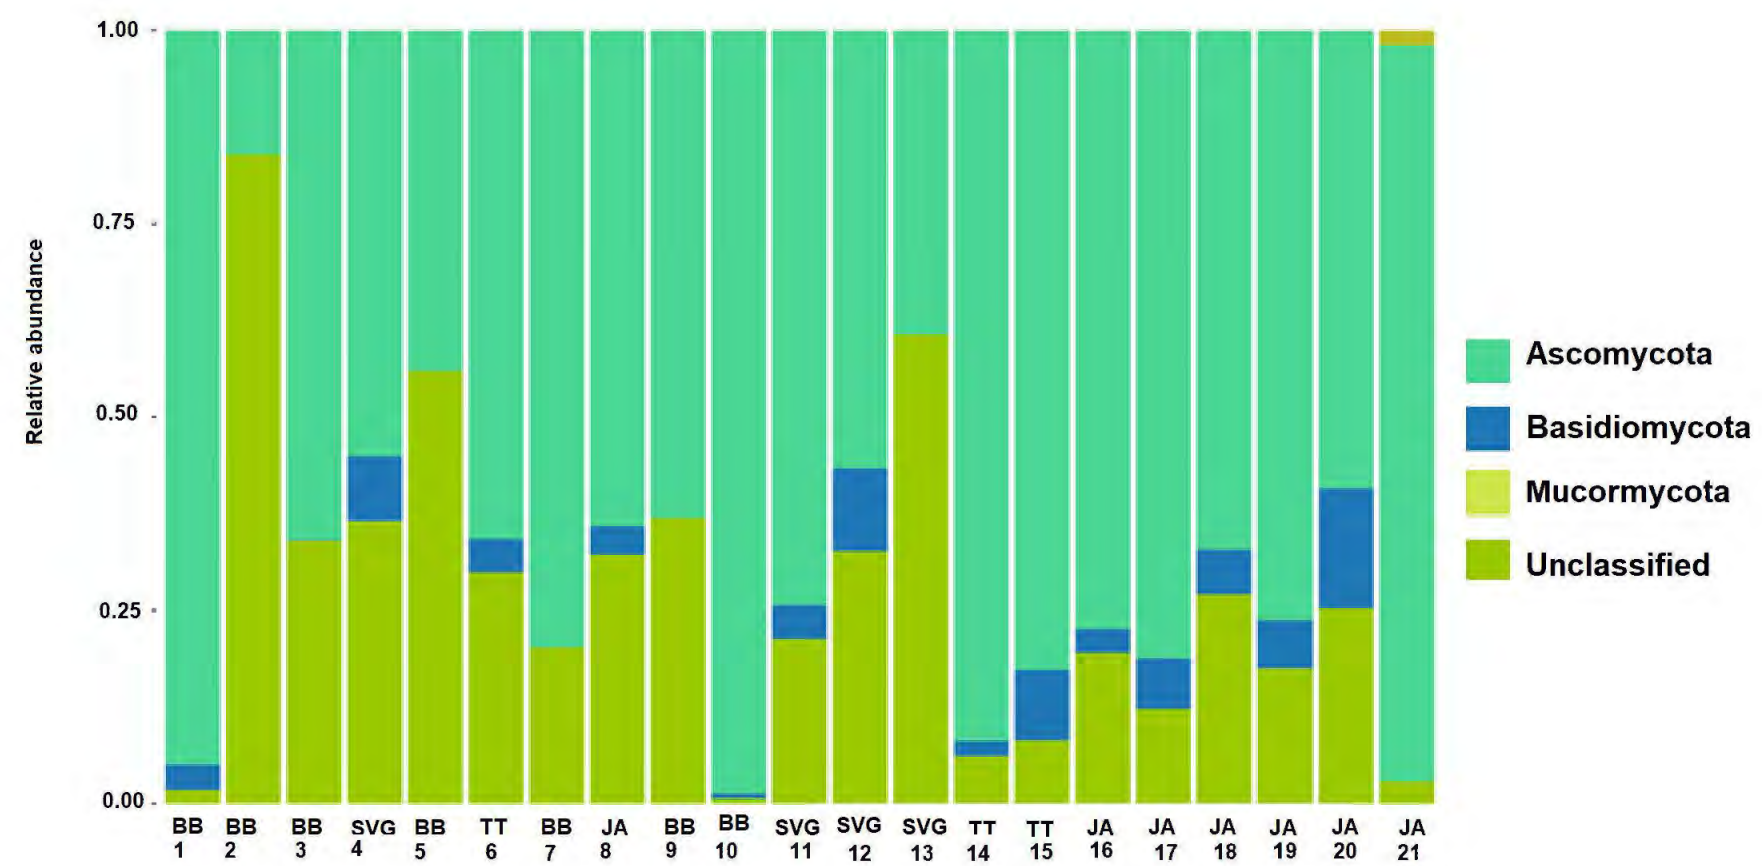

Supplemental Figure S1- Relative abundance of fungal phyla from symptomatic cassava leaf samples from BB, JA, SVG and TT.

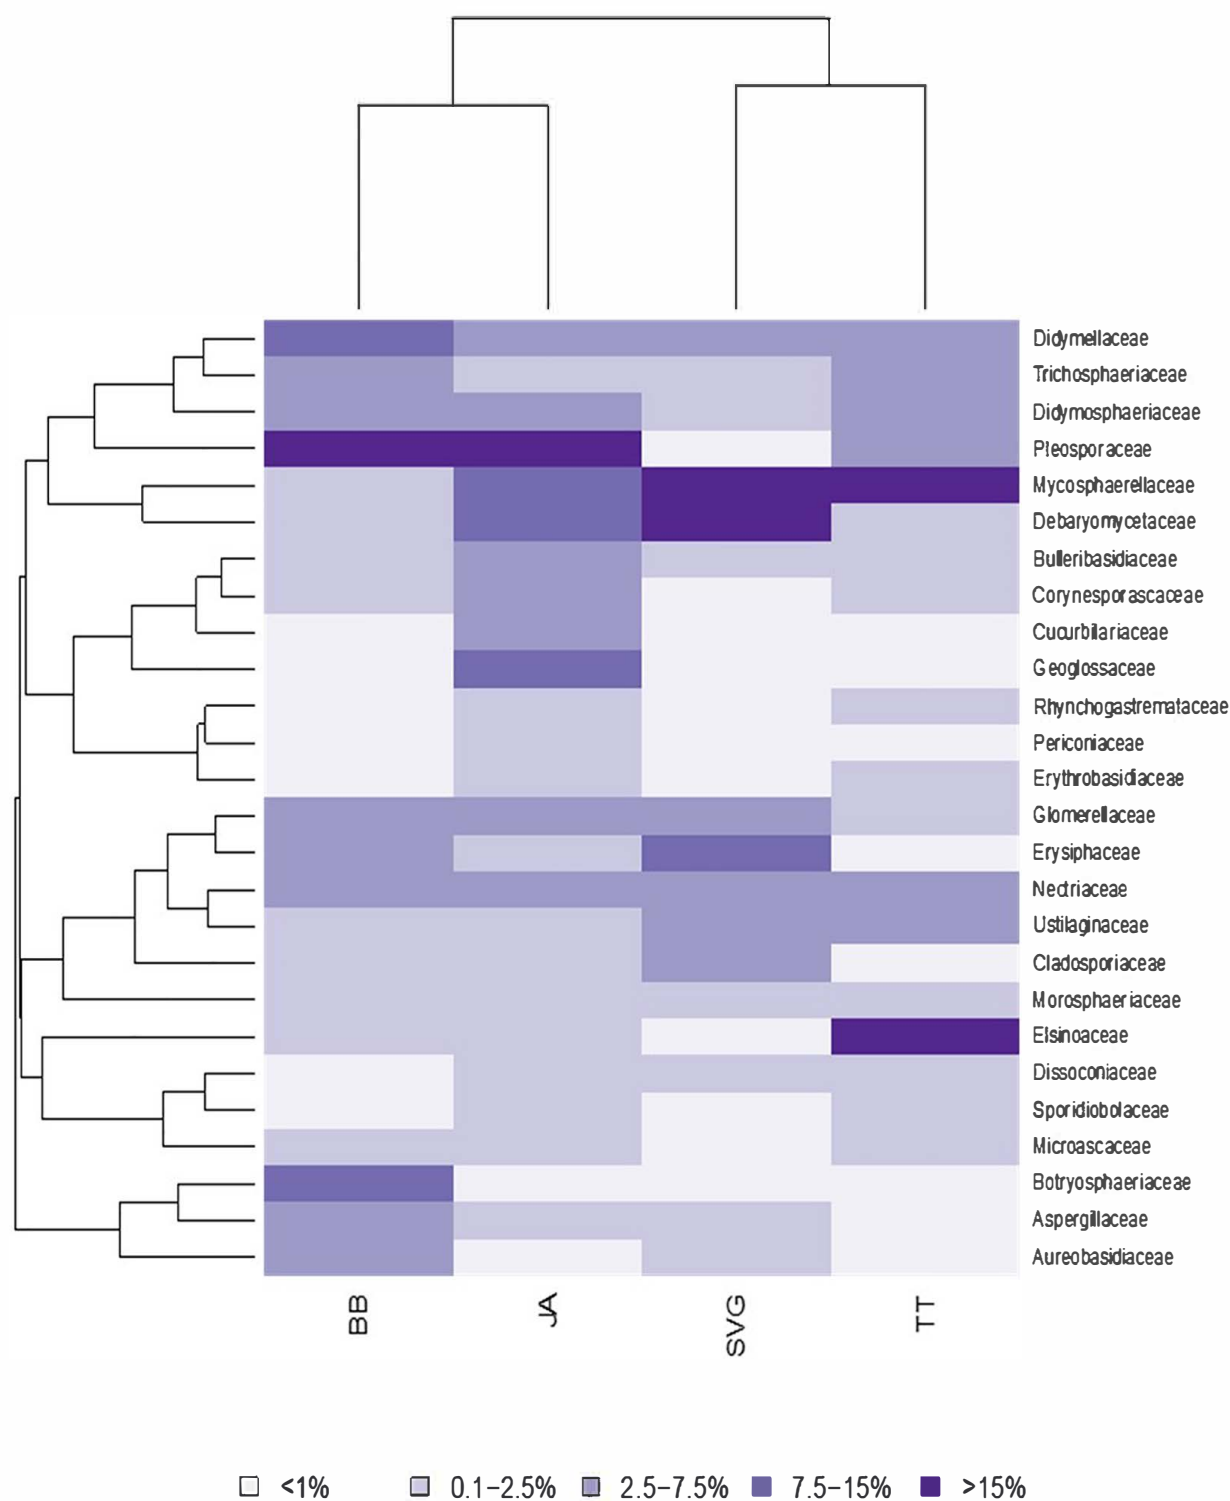

**Supplemental Figure S2:** Heatmap showing the class composition by OTUs in infected cassava from BB, JA, SVG and TT.
